# Supplementary material for: Lactobacilli Strain Mixture Alleviates Bacterial Vaginosis through Antibacterial and Antagonistic Activity in Gardnerella vaginalis-Infected C57BL/6 Mice
Source: MDPI journal article supplement (doi:10.3390/microorganisms10020471), 2022-02-20
Supplement: s1 [file s1]

## Supplementary data

### Effect of individual lactobacilli strains administration in GV-infected BV mice

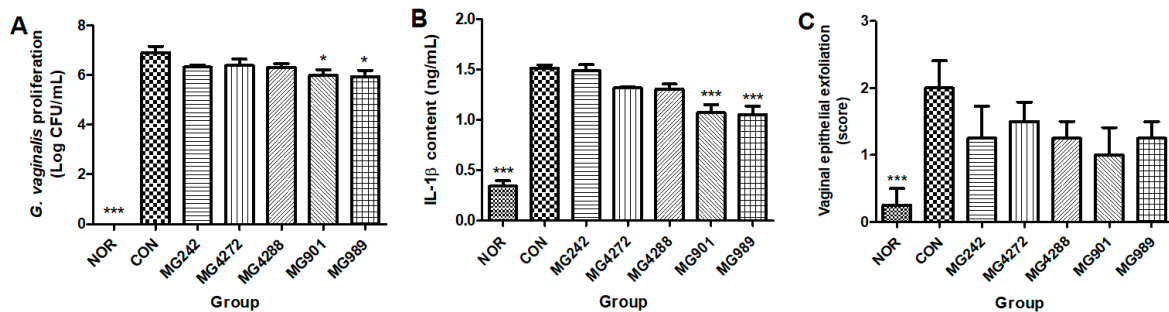

**Figure S1.** Effect of individual lactobacilli strains administration on GV proliferation, IL-1 $\beta$  production, and vaginal epithelial exfoliation in GV-infected BV mice. For the induction of BV by GV infection, mice were randomly distributed into the following seven groups (n = 6/group): (1) normal (NOR), (2) control (CON), (3) MG242, (4) MG4272, (5) MG4288, (6) MG901, and (7) MG989. All *Lactobacillus* strain groups were administered at the concentrations of  $5 \times 10^9$  CFU/mouse orally once daily for 2 weeks from the day following GV induction.

### Effect of lactobacilli strains mixture administration in GV-infection BV mice

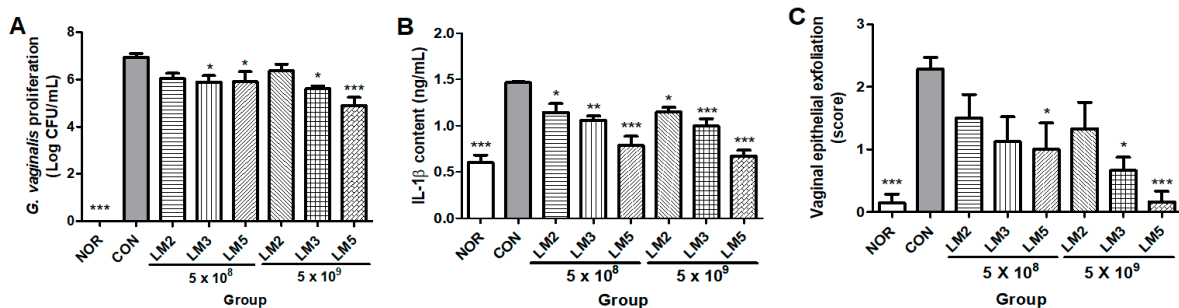

**Figure S2.** Effect of lactobacilli strains mixtures administration on GV proliferation, IL-1 $\beta$  production, and vaginal epithelial exfoliation in GV-infected BV mice. For the induction of BV by GV infection, mice were randomly distributed into the following five groups (n = 6/group): (1) normal (NOR), (2) control (CON), (3, 6) LM2 (1:1 mixture of MG4272 and MG4288), (4, 7) LM3 (1:1:1 mixture of MG242, MG901, and MG989), and (5, 8) LM5 (1:1:1:1:1 mixture of MG4272, MG4288, MG242, MG901, and MG989). All *Lactobacillus* mixtures groups were administered at two concentrations of  $5 \times 10^8$  CFU/mouse (3, 4, and 5 groups) or  $5 \times 10^9$  CFU/mouse (6, 7, and 8 groups) orally once daily for 2 weeks from the day following GV induction.
